# Supplementary material for: Lactococcus lactis subsp. cremoris C60 induces macrophages activation that enhances CD4+ T cell-based adaptive immunity
Source: PubMed Central journal article supplement — Biosci Microbiota Food Health. 2022 Apr 6;41(3):130–6. doi: 10.12938/bmfh.2021-057 (PMC9246417; doi:10.12938/bmfh.2021-057), 2022-04-06
Supplement: bmfh-41-130-s001.pdf [file bmfh-41-130-s001.pdf]

## Supplemental information

### **Supplementary Fig. 1. Cytokine production in antigen-dependently stimulated CD4+ T cells in co-culture with TPMs**

A-E) The splenocytes were prepared from OT-II mice, then CD4+ T cells were isolated from the cell suspension by using magnetic sorting. The CD4+ T cells ( $2.0 \times 10^6$ /mL) were cultured with TPMs ( $1.0 \times 10^7$ /mL) the presence of OVA<sub>323-339</sub> peptide (100 ng/mL). The culture was further treated with HK-C60 ( $5.0 \times 10^8$  CFU/mL) or vehicle control (PBS) and incubated at 37°C for 24 h. The cytokine producing cells in CD3+CD4+gate was analyzed by flow cytometry. The cumulative data were shown as mean +/- SEM of five samples in two independent experiments. Value of \* $p < 0.05$  was regarded as significance. ns; not-significant.

### **Supplementary Fig. 2. HK-C60 enhances CD4+ T cells activity with antigen presentation from macrophages**

The splenic CD4+ T cells were isolated from OT-II mice by magnetic sorting. The CD4+ T cells ( $2.0 \times 10^6$ /mL) were used for the stimulation with anti-CD3/CD28 microbeads ( $4.0 \times 10^5$ /mL), co-culture with TPMs ( $1.0 \times 10^7$ /mL) with OVA<sub>323-339</sub> peptide (100 ng/mL) or vehicle control (PBS). The cultures were further treated with HK-C60 ( $5.0 \times 10^8$ /mL) or vehicle control (PBS). The cultures were incubated at 37°C for 24 h, then IFN- $\gamma$ +CD4+ T cells were analyzed by flow cytometry. IFN- $\gamma$  production was detected in CD3+CD4+gate in the flow cytometry analysis. The cumulative data were shown as mean +/- SEM of three samples in three independent experiments. Value of \* $p < 0.05$  was regarded as significance. ns; not-significant.

Supplementary Fig. 1

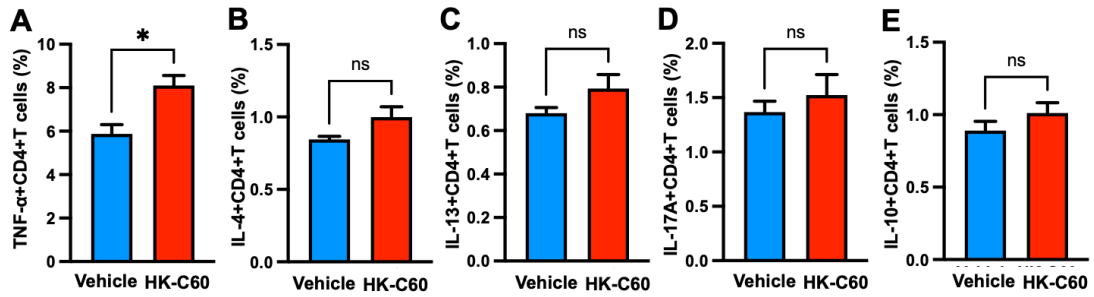

Supplementary Fig. 2

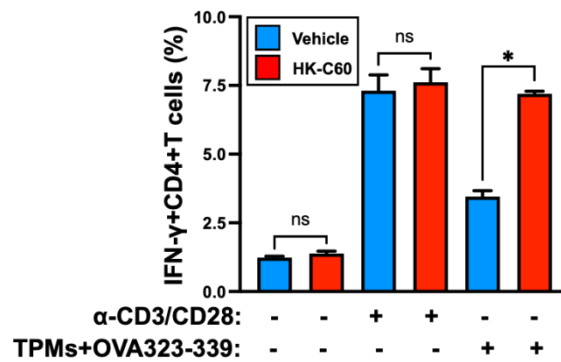

### Supplemental protocol

#### *In vitro* CD4+ T cells stimulation

Splenic CD4+ T cells were isolated from OT-II mice. The CD4+ T cells ( $2.0 \times 10^6$ /mL) were seeded in 96 well plate, then treated with Dynabeads™ Mouse T-Activator CD3/CD28 for T-Cell Expansion and Activation ( $5.0 \times 10^4$ /mL, Thermo Fisher Scientific) or vehicle control (PBS). The cultures were further treated with HK-C60 ( $5.0 \times 10^8$ /mL) or vehicle control (PBS). After incubation at 37°C for 24 h, the IFN- $\gamma$  production in CD4+ T cells were analyzed by flow cytometry.
